# Supplementary material
Source: publisher figshare collection journal article supplement (https://sage.figshare.com/ndownloader/files/13365665)
Supplement: Supplementary file 1 [file 13365665]

## Appendix 1: Items

### Wave 1 Ideal

“The next questions are about romantic relationships. Please imagine your ideal romantic relationship in the next year. Go through this deck of cards and give me any that describe things that would NOT happen in this perfect relationship.

Now look through the remaining cards and put them in the order in which you think things should first happen in your perfect relationship. Whatever you think should happen first should be the first card, the thing you would like to have happen second should be the second card, and so on.

Don’t worry if you think two things should happen at the same time. Just pick one of them to put first, and put the other after it.”

We would go out together in a group

I would meet my partner’s parents

I would tell other people we were a couple

We would go out together alone

We would hold hands

We would talk about contraception or sexually transmitted diseases

We would kiss

We would have sex

### Wave 2 Most Recent Real Sequence

“Please look at the cards given to you earlier, and first take out all the cards that describe things that have NOT happened in your romantic relationship with {INITIALS}. Set these cards aside. Then, look through the remaining cards, and put them in the order in which they first happened in your romantic relationship with {INITIALS}. Whatever happened first should be the first card, the thing that happened second should be the second card, and so on. Don’t worry if two things happened at the same time. Just pick one to put first, and put the other one after it.

Type in the numbers of the things that happened in your romantic relationship with {INITIALS},

from the cards you put in order.”

You went out together in a group

You met your partner’s parents

You told other people you were a couple

You and your partner went out together alone

You held hands

You talked about contraception or sexually transmitted diseases

You kissed

You had sexual intercourse.

#### Psychological Distress

“These questions will ask about how you feel emotionally and about how you feel in general.

How often was each of the following things true during the past week?

1. You felt that you could not shake off the blues, even with help from your family and your friends
2. You felt depressed
3. You felt life was not worth living
4. You felt sad
5. You were happy (reverse coded)

“never or rarely” = 0, “sometimes” = 1, “a lot of the time” = 2, “most or all of the time” = 3
